# Supplementary material
Source: HighWire-hosted journal article supplement (https://n.neurology.org/content/suppl/2007/11/08/68.10.723)
Supplement: Armon_68-10-723.pdf [file Armon_68-10-723.pdf]

# Valoración del empleo de inyecciones epidurales de corticoides en el tratamiento del dolor radicular lumbosacro

Informe del Therapeutics and Technology Assessment Subcommittee de la American Academy of Neurology

C. Armon, MD, MHS  
C. E. Argoff, MD  
J. Samuels, MD  
M.-M. Backonja, MD

**RESUMEN** Tomando como base las evidencias científicas disponibles, el Therapeutics and Technology Assessment Subcommittee llegó a las siguientes conclusiones: 1) las inyecciones epidurales de corticoides pueden producir cierta mejoría del dolor radicular lumbosacro, si se valora entre dos y seis semanas después de la inyección, en comparación con los tratamientos control (nivel de evidencia C, clase I-III). La magnitud promedio del efecto es pequeña y la generalización de la observación queda limitada por el pequeño número de estudios, la alta selectividad de las poblaciones de pacientes, las escasas técnicas y dosis probadas y la diversidad de tratamientos de comparación empleados; 2) en general, la inyección epidural de corticoides para el dolor radicular lumbosacro no modifica el pronóstico funcional o la necesidad de cirugía, ni aporta un alivio del dolor a largo plazo, más allá de los tres meses. No se recomienda su aplicación sistemática para estas indicaciones (nivel de evidencia B, clase I-III), y 3) no existen pruebas suficientes para recomendar el empleo de las inyecciones epidurales de corticoides para tratar el dolor radicular cervical (nivel U). **NEUROLOGY 2007;68:723-729**

El dolor de espalda crónico y las discapacidades asociadas a éste representan un problema de salud importante<sup>1</sup>. La creciente prevalencia de la obesidad puede aumentar la repercusión del dolor de espalda crónico. La naturaleza competitiva de los puestos de trabajo actuales discrimina a los sujetos que no tengan una salud casi perfecta y especialmente a aquellos con afecciones dolorosas. El acondicionamiento del lugar de trabajo no suele ser una opción en la mayoría de empleos, y cuando es viable se acompaña con frecuencia de pérdidas económicas tanto para el empleado como para el empleador.

En Estados Unidos, se estimó que en 1998 los individuos con dolor de espalda generaron un gasto total de asistencia sanitaria de unos 90.700 millones de dólares<sup>2</sup>. La atención hospitalaria supuso el 31 % del total de gastos, seguida de las visitas a consulta (26 %), los fármacos con necesidad de receta (15,6 %) y los procedimientos ambulatorios (13,1 %). Las visitas a urgencias y domiciliarias representaron cada una de ellas el 3 % de los gastos. Del total de los 90.700 millones de dólares de gastos atribuidos a estos individuos, el desembolso debido directamente al dolor de espalda ascendió aproximadamente a 26.300 millones de dólares<sup>2</sup>, de los cuales el 42 % correspondían a visitas a consulta, el 18 % a procedimientos ambulatorios, el 17 % a atención hospitalaria, el 15 % a fármacos con receta médica y el 4 % a visitas al servicio de urgencias. El coste calculado de los tratamientos para el dolor espinal (tratamiento médico,

inyecciones epidurales de corticoides, estimulación de la médula espinal y narcóticos intratecales) para el año 1990 sumó por lo menos 13.000 millones de dólares, con un crecimiento anual del 7 %<sup>3</sup>. Los reembolsos de la parte B de Medicare en 1999 para los 40,4 millones de personas con cobertura fueron de 49,9 millones de dólares para las inyecciones epidurales lumbares de corticoides, 8,5 millones de dólares para las infiltraciones facetarias o perifacetarias lumbares y 5,6 millones de dólares para las inyecciones epidurales cervicales o torácicas de corticoides<sup>4</sup>.

La lumbalgia puede producirse con o sin manifestaciones radiculares (el primer caso a menudo se denomina ciática). En el sentido más estricto, la ciática hace referencia al dolor que baja hacia el lado posterior de la extremidad inferior. En la bibliografía examinada para este informe se ha observado un uso menos restrictivo del término, en el sentido de una

lumbalgia con irradiación. En las exploraciones complementarias puede detectarse o no una causa estructural de la ciática, como un disco herniado o estenosis foraminal. En sujetos asintomáticos pueden identificarse anomalías en las pruebas de imagen, pero puede ser incorrecto inferir un papel causal de las alteraciones estructurales radiológicas, aunque sean concordantes con la distribución de la ciática.

Las publicaciones sobre las inyecciones epidurales de corticosteroides para el tratamiento de la ciática se remontan a la década de 1950<sup>5,6</sup>. Su aplicación ha aumentado a lo largo del tiempo a pesar de la escasez de datos fiables, como lo reflejan las revisiones contradictorias sobre su eficacia y seguridad<sup>7,9</sup>. Estas revisiones utilizaron criterios distintos en la incorporación de pacientes, el diseño de estudio, los tipos de intervenciones, los criterios de valoración y la aplicación de tratamientos complementarios. Una revisión reciente (2004) del subcomité de evaluación terapéutica y tecnológica del Institute of Clinical Systems Improvement (ICSI)<sup>10</sup> centró la atención en las inyecciones epidurales transforaminales de corticoides, guiadas mediante fluoroscopia, para tratar la lumbalgia radicular. A pesar de utilizar un planteamiento basado en la evidencia científica, el sistema de evaluación es distinto al de la American Academy of Neurology (AAN). Se llegó a la conclusión de que, aunque los resultados basados en escasos datos parecían prometedores, la evidencia era insuficiente para confirmar la eficacia de las inyecciones epidurales transforaminales de corticoides en la lumbalgia radicular<sup>10</sup>.

Un editorial reciente<sup>11</sup>, que analiza el papel de los ensayos controlados con placebo, subraya que los tratamientos para el dolor que se consideran efectivos basándose en observaciones clínicas o estudios de casos no controlados pueden resultar ineficaces cuando se prueban en estudios controlados con placebo bien diseñados. Para evitar este error y obtener datos de mayor calidad, son necesarios estudios con distintos grupos de tratamiento que incorporen una definición rigurosa de los casos, el empleo de un tratamiento control (placebo o activo), la utilización de una escala de eficacia estandarizada, el enmascaramiento del paciente y del evaluador respecto al tratamiento (doble ciego) y la recopilación de datos sobre la seguridad. Los datos deberían permitir el cálculo del número de pacientes que es necesario tratar para que un paciente más consiga una mejoría respecto a la que se obtendría con un tratamiento control (placebo u otro tratamiento activo).

En la tabla 1 se enumera una serie de cuestiones importantes relativas a los corticoides epidurales. Sin embargo, el número de estudios de alta calidad fue pequeño. Por consiguiente, la pregunta de «cuáles son

las pruebas que respaldan el empleo de inyecciones epidurales de corticoides en el dolor radicular lumbosacro para obtener un alivio del dolor» se trató en primer lugar. En los estudios de mayor calidad identificados se consideraron otros criterios de valoración, además de los criterios para los que existían datos de alta calidad según la opinión de los revisores.

**MÉTODOS. Eficacia.** Se realizaron búsquedas en Medline en abril de 2003 y febrero de 2005 mediante las combinaciones de términos «epidural injections» (inyecciones epidurales) o «epidural steroids» (corticoides epidurales), «double-blind» (doble ciego), «placebo-controlled» (controlado con placebo) y «radiculopathy» (radiculopatía). Una búsqueda en la base de datos Cochrane sobre revisiones sistemáticas no identificó ninguna revisión sobre la aplicación de inyecciones epidurales de corticoides para tratar el dolor radicular. Se utilizaron los siguientes criterios de inclusión: 1) definición clara de los casos; 2) criterios de valoración (del alivio del dolor) claros mediante medidas estandarizadas; 3) uso de un grupo control (placebo o activo); 4) asignación aleatorizada; 5) diseño del estudio al menos con doble ciego, de modo que el paciente y el evaluador del criterio de valoración desconocieran el grupo de tratamiento; o bien con triple ciego, si el médico que inyectaba el tratamiento también desconocía el tratamiento que administraba; 6) diseño de estudio prospectivo, y 7) análisis estadístico adecuado.

En los artículos identificados en esta primera fase y en determinados artículos de revisión se examinaron las referencias bibliográficas en busca de nuevos artículos que cumplieran con los criterios de inclusión, pero no se halló ninguno. También se tuvieron en cuenta los artículos identificados por revisores de versiones anteriores del manuscrito. Se empleó el mayor nivel de evidencia científica para elaborar conclusiones y recomendaciones sobre el parámetro en cuestión. Debido a que los artículos sobre el tratamiento epidural con corticoides para el dolor radicular cervical no reunían estos criterios, sólo se discutirá sobre los corticoides en el tratamiento del dolor radicular lumbosacro.

**Seguridad.** Se llevó a cabo una búsqueda independiente en Medline con las palabras «epidural steroid» (corticoides epidurales) y «complications» (complicaciones) con el fin de identificar las complicaciones descritas de esta intervención. Se resumen brevemente los resultados de algunos artículos seleccionados, así como de los estudios de eficacia elegidos para su inclusión en el artículo.

**RESULTADOS. Eficacia.** Con la búsqueda bibliográfica se obtuvieron 37 artículos, cuatro de los cuales cumplieron con los criterios de inclusión predeterminados<sup>12-15</sup> y cuyos resultados se resumen en la tabla 2. La revisión exhaustiva de un quinto artículo<sup>16</sup> dio lugar a su exclusión, ya que los criterios de valoración no eran claros, los tiempos de las variables informadas eran inciertos y no se describían los resultados del análisis estadístico de las variables de interés. Los dos artículos considerados como de mayor calidad en la revisión del ICSI<sup>17,18</sup> también se resumieron en la tabla 2. Algunos de los estudios combinaron los corticoides con un anestésico local, utilizando éste una solución salina normal como control, mientras que

**Tabla 1** Cuestiones a tener en cuenta en la aplicación epidural de corticoides

|                                                                                                                                                                                                                                                             |
|-------------------------------------------------------------------------------------------------------------------------------------------------------------------------------------------------------------------------------------------------------------|
| 1. a. ¿A quién se trata?<br>Diagnóstico en los pacientes tratados<br>Datos personales (edad, sexo)<br>b. ¿A quién se debería tratar?                                                                                                                        |
| 2. Factores que predicen el resultado (bueno/malo)<br>Factores que predicen quién no debería recibir el tratamiento                                                                                                                                         |
| 3. ¿Cuál es la duración esperada de la mejoría?                                                                                                                                                                                                             |
| 4. ¿Cuál es la técnica más apropiada?<br>a. Dirección de la aguja<br>b. Tipo de aguja<br>c. Dosis de la medicación<br>d. ¿Con o sin fluoroscopia?                                                                                                           |
| 5. Competencia del médico que aplica el tratamiento                                                                                                                                                                                                         |
| 6. ¿Resulta suficiente la inyección epidural o debería aplicarse un tratamiento complementario de otro tipo?<br>a. ¿En qué se parece a otras modalidades terapéuticas o cómo se suma a éstas?<br>b. ¿Debería combinarse con otras modalidades terapéuticas? |
| 7. ¿Puede diferenciarse un tratamiento para pacientes agudos, subagudos o crónicos, y existe alguna diferencia en el resultado?                                                                                                                             |
| 8. ¿Cómo se mide la eficacia?<br>a. ¿Qué instrumentos se emplean para medir la eficacia?<br>b. ¿Qué medida debería utilizarse para determinar la eficacia?<br>c. ¿Cómo se define el éxito del tratamiento?                                                  |
| 9. ¿Existen pruebas sobre la eficacia?                                                                                                                                                                                                                      |
| 10. Seguridad: ¿hasta qué punto es inocuo el método de tratamiento? ¿Existen riesgos asociados?                                                                                                                                                             |

otros compararon los corticoides con una solución salina normal.

**Seguridad.** La complicación más frecuente del tratamiento es una cefalea transitoria, asociada o no a perforación dural identificable<sup>14</sup>. Las complicaciones más graves<sup>19</sup>, resumidas en una revisión publicada en 1996, consistieron en varios casos de meningitis aséptica, aracnoiditis y síndrome del cono medular, generalmente después de múltiples inyecciones subaracnoideas. También se comunicaron dos casos de absceso epidural, un caso de meningitis bacteriana y un caso de meningitis aséptica (la introducción subaracnoidea del fármaco no pudo descartarse en los casos de meningitis)<sup>19</sup>. Se informó un hematoma retroperitoneal en un paciente que seguía un tratamiento anticoagulante y recibió una inyección transforaminal de corticoides guiada mediante fluoroscopia<sup>18</sup>. También se han hallado complicaciones transitorias durante las inyecciones epidurales caudales guiadas con fluoroscopia, entre ellas, insomnio, cefaleas no posturales transitorias, aumento del dolor de espalda, eritema facial, reacciones vasovagales, náuseas y mayor dolor de la extremidad inferior<sup>20</sup>. No se describieron complicaciones neurológicas relevantes (hematomas espinales)<sup>21</sup> en una serie de 1.035 individuos a los que

se administraron inyecciones epidurales mientras seguían un tratamiento antiagregante plaquetario. En el 5,2 % de los casos se informaron complicaciones leves (sangrado durante la introducción de la aguja) y en el 4 % de los pacientes se produjo un empeoramiento transitorio de los síntomas o la aparición de nuevos síntomas neurológicos durante más de 24 horas tras la inyección, con una duración mediana de tres días y un intervalo de 1 a 20 días. Las descripciones cualitativas de complicaciones graves en otros estudios de seguridad han sido muy poco frecuentes<sup>21</sup>. Un riesgo potencial añadido de las inyecciones transforaminales guiadas mediante fluoroscopia es la exposición a la radiación; sin embargo, la exposición por parte del médico intervencionista se mantuvo dentro de los límites de seguridad cuando se siguieron los protocolos adecuados<sup>22</sup>.

En función de estas publicaciones, no puede determinarse el efecto de la experiencia del médico o de la confirmación radiológica de la ubicación de la aguja. Los resultados del único estudio de alta calidad en el que se confirmó radiológicamente la localización de la aguja no proporcionó datos de comparación entre las técnicas. En consecuencia, la utilidad o necesidad de la confirmación fluoroscópica de la posición de la aguja es incierta.

**COMENTARIO.** Comparación con los resultados de la revisión del ICSI. Esta revisión, basada en evidencias científicas, y centrada específicamente en las inyecciones transforaminales guiadas con fluoroscopia<sup>10</sup>, identificó dos estudios considerados como de alta calidad y que no se habían encontrado en las búsquedas con Medline. Un estudio trató el alivio del dolor<sup>18</sup> y se confirmó que era de alta calidad (evidencia de clase I). Sus resultados concordaban con los estudios realizados sin guía radiológica. El segundo artículo utilizó la ausencia de cirugía como criterio principal de valoración<sup>17</sup>. No obstante, las limitaciones metodológicas de éste dieron lugar a una menor valoración, según el sistema empleado aquí (evidencia de clase III). Las limitaciones consistieron en el pequeño tamaño de la muestra, la elevada selectividad de la muestra debido a la autoselección de los participantes, la definición imprecisa de los casos, la falta de control de los posibles factores de confusión y la información insuficiente sobre los motivos de la cirugía en los pacientes. Los resultados que apoyaban la eficacia del tratamiento, aunque eran concordantes con un artículo previamente identificado<sup>13</sup>, se contradijeron con los de artículos que tenían una valoración más alta y mostraron la falta de efectos de la cirugía<sup>14,18</sup>. La ausencia de coincidencia entre los artículos de alta calidad identificados con las dos estrategias de

| Tabla 2 Evidencia científica sobre la aplicación epidural de corticoides |      |                                                                                                                                                                                                                                                                                                                                                                                                                                                                                                                                                                                                                     |                                                                                                                                                                                                                                                                                                                                                                                                                                              |                                                                                                                                                                                                                                                                                                                                                                                                                                                                                                                                                                                                                                                                                                                                                                                                                                      |                                                                                                                                                                                               |                                                                                                                                                                                                              |
|--------------------------------------------------------------------------|------|---------------------------------------------------------------------------------------------------------------------------------------------------------------------------------------------------------------------------------------------------------------------------------------------------------------------------------------------------------------------------------------------------------------------------------------------------------------------------------------------------------------------------------------------------------------------------------------------------------------------|----------------------------------------------------------------------------------------------------------------------------------------------------------------------------------------------------------------------------------------------------------------------------------------------------------------------------------------------------------------------------------------------------------------------------------------------|--------------------------------------------------------------------------------------------------------------------------------------------------------------------------------------------------------------------------------------------------------------------------------------------------------------------------------------------------------------------------------------------------------------------------------------------------------------------------------------------------------------------------------------------------------------------------------------------------------------------------------------------------------------------------------------------------------------------------------------------------------------------------------------------------------------------------------------|-----------------------------------------------------------------------------------------------------------------------------------------------------------------------------------------------|--------------------------------------------------------------------------------------------------------------------------------------------------------------------------------------------------------------|
| Nº                                                                       | Ref. | Diseño del estudio, n.º de pacientes, criterios de inclusión, tratamiento evaluado, control                                                                                                                                                                                                                                                                                                                                                                                                                                                                                                                         | Criterio de valoración; análisis primario o secundario                                                                                                                                                                                                                                                                                                                                                                                       | Resultados (magnitud del efecto, significación clínica)                                                                                                                                                                                                                                                                                                                                                                                                                                                                                                                                                                                                                                                                                                                                                                              | Significación estadística                                                                                                                                                                     | Grupo de evidencia                                                                                                                                                                                           |
| 1                                                                        | 12   | 1. Prospectivo, aleatorizado, doble ciego<br>2. 73 pacientes<br>3. Síndromes de dolor radicular lumbar; todos los datos radiológicos concuerdan con los síntomas u observaciones y no han mejorando después de dos semanas de tratamiento conservador<br>4. Una inyección: 7 ml de acetato de metilprednisolona + procaína frente a 7 ml de solución salina + procaína                                                                                                                                                                                                                                              | 1. Resultado a corto plazo: mejoría subjetiva del 75 % o más a las 24 horas de la inyección<br>2. Resultado a largo plazo: mejoría subjetiva de al menos el 75 % en el último contacto (13-37 meses, promedio de 20 meses, después de la inyección; no ha sufrido una laminectomía                                                                                                                                                           | 1. Sin diferencias<br>2. Sin diferencias                                                                                                                                                                                                                                                                                                                                                                                                                                                                                                                                                                                                                                                                                                                                                                                             | 1. $p = 0,2$ ;<br>2. NS                                                                                                                                                                       | I                                                                                                                                                                                                            |
| 2                                                                        | 13   | 1. Prospectivo, aleatorizado, doble ciego<br>2. 23 pacientes<br>3. «Síntomas y signos de afectación de la raíz nerviosa»; signos no esenciales, radiografía no esencial; duración de los síntomas 1-13 meses, promedio 4,7 meses<br>4. Dos inyecciones caudales, una al inicio y la otra a las dos semanas, de 25 ml con 80 mg de acetona de triamcinolona en solución salina normal con 0,5 % de procaína HCl frente a 25 ml de solución salina normal<br>5. ADVERTENCIA: Desequilibrio inicial entre grupos; prueba de Lasègue peor en el grupo tratado, que describió un menor dolor y gravedad de los síntomas. | 1. Evaluación al inicio, a las cuatro semanas y al año<br>2. Subjetivo: cuestionario de sintomatología de Grogono y Woodgate (estilo de vida) EAV (dolor de espalda); EAV (dolor en la pierna) Objetivo: ángulo en la prueba de Lasègue;<br>3. Puntuaciones absolutas de variables subjetivas y modificación del ángulo en la prueba de Lasègue, entre la visita y la situación basal (valores distintos entre grupos en la situación basal) | 1. A las cuatro semanas: mejoría en el grupo con tratamiento activo y no en el grupo placebo; gravedad de los síntomas, 15,88 puntos (T) frente a 13,7 puntos (P); EAV, 38,5 mm hasta 16 mm (T) frente a 49,2 mm hasta 45 mm (P); Prueba de Lasègue, 43,8° hasta 73,3° (T) frente a 63,2° hasta 65° (P)<br>2. A las 52 semanas: gravedad de los síntomas 16,6 puntos (T) frente a 15,6 puntos (P); EAV, 14,2 mm (T) frente a 29,6 mm (P); Prueba de Lasègue, 80,3° (T) frente a 74,1° (P)<br>3. Más abandonos del estudio y más intervenciones quirúrgicas en el grupo placebo                                                                                                                                                                                                                                                       | 1. Medidas subjetivas: $p = 0,02$ ; Prueba de Lasègue: $p = 0,01$<br>2. Medidas subjetivas: NS; Prueba de Lasègue: $p = 0,01$ , utilizada la prueba de la suma de rangos de Wilcoxon<br>3. NS | II                                                                                                                                                                                                           |
| 3                                                                        | 14   | 1. Prospectivo, aleatorizado, doble ciego<br>2. 158 pacientes<br>3. Síntomas de ciática durante >4 semanas y <1 año; pruebas según la TC de un disco herniado en un nivel correspondiente con los síntomas; puntuación >20 en el cuestionario de discapacidad por lumbalgia de Oswestry<br>4. 80 mg de acetato de metilprednisolona en 8 ml de solución salina isotónica frente a 1 ml de solución salina isotónica. La inyección se repetía a las tres y seis semanas si el paciente no informaba una mejoría global notable                                                                                       | 1. Criterio principal de valoración: Puntuación de Oswestry a los tres meses según la intención de tratar<br>2. Resultado también determinado a las tres y seis semanas<br>3. Varios criterios secundarios de valoración                                                                                                                                                                                                                     | 1. Sin diferencias en ningún criterio de valoración a los tres meses<br>2. a) A las seis semanas, menor dolor en la pierna según el EAV: 11 mm de diferencia de cambio medio a favor del grupo de tratamiento (IC del 95 % de 0,9 a 21,1); puntuaciones absolutas: basales: grupo de tratamiento 65,6 mm, placebo 61,5 mm (DE 21,5 mm); a las tres semanas: 44,9 mm (T), 49,1 mm (P); a las seis semanas: no disponible; a los tres meses: 38,9 mm (T), 39,5 mm (P) Magnitud del efecto (valor de Cohen) a las 3-6 semanas: 0,4-0,5 (0,2 = pequeño; 0,5 = moderado), b) Menor necesidad de analgésicos en el grupo de tratamiento entre las 3-6 semanas (mediana, 50 frente a 17)<br>3. Abandonos, 25 % en el grupo placebo frente al 15 % en el grupo tratado<br>4. Proporción similar de intervenciones quirúrgicas a los 12 meses | 1. NS<br>2. a) $p = 0,03$ a las seis semanas; otros = NS, b) $p = 0,01$ (sin corrección respecto a las comparaciones múltiples)<br>3. NS<br>4. NS                                             | I, para el criterio principal de valoración a los tres meses<br>II, para el dolor en los momentos iniciales<br>III, para otros criterios de valoración: análisis múltiples; tamaño medio del efecto reducido |
| 4                                                                        | 15   | 1. Prospectivo, aleatorizado, doble ciego; conocimiento del paciente, evaluadores del resultado enmascarados<br>2. 36 pacientes, edad <50 años<br>3. Dolor radicular lumbocático con anomalías concordantes en la RM o hernia discal, signo de Lasègue positivo, <60°; sin cirugía previa<br>4. 17 pacientes: tres inyecciones de 100 mg de metilprednisolona en 10 ml de bupivacaína al 0,25 % en los siguientes 14 días de la hospitalización; ambos grupos con tratamiento conservador estándar y un programa de rehabilitación progresivo                                                                       | 1. Evaluación al inicio, a las dos y seis semanas, y seis meses después de iniciar el tratamiento<br>2. Prueba de Lasègue, EAV, Hannover Functional Ability Questionnaire                                                                                                                                                                                                                                                                    | 1. Sin diferencias entre grupos a las seis semanas y a los seis meses;<br>2. Mejoría superior en la prueba de Lasègue en el grupo tratado, a las dos semanas: media, 33,5° que mejoró hasta los 75°, frente a 36,6° hasta 66°                                                                                                                                                                                                                                                                                                                                                                                                                                                                                                                                                                                                        | 1. NS<br>2. $p = 0,03$ (sin corrección respecto a las comparaciones múltiples)                                                                                                                | III                                                                                                                                                                                                          |

(Continúa)

| Nº | Ref. | Diseño del estudio, n.º de pacientes, criterios de inclusión, tratamiento evaluado, control                                                                                                                                                                                                                                                                                                                                                                                                                                                                                                                                                                                                                                                                                                                                                         | Criterio de valoración; análisis primario o secundario                                                                                                                                                                                                                                                                                                                                                                                                                                                                                                                                                                         | Resultados (magnitud del efecto, significación clínica)                                                                                                                                                                                                                                                                                                                                                                                                                                                                                                                                                                                                                                                     | Significación estadística                                                                                                                                                            | Grupo de evidencia |
|----|------|-----------------------------------------------------------------------------------------------------------------------------------------------------------------------------------------------------------------------------------------------------------------------------------------------------------------------------------------------------------------------------------------------------------------------------------------------------------------------------------------------------------------------------------------------------------------------------------------------------------------------------------------------------------------------------------------------------------------------------------------------------------------------------------------------------------------------------------------------------|--------------------------------------------------------------------------------------------------------------------------------------------------------------------------------------------------------------------------------------------------------------------------------------------------------------------------------------------------------------------------------------------------------------------------------------------------------------------------------------------------------------------------------------------------------------------------------------------------------------------------------|-------------------------------------------------------------------------------------------------------------------------------------------------------------------------------------------------------------------------------------------------------------------------------------------------------------------------------------------------------------------------------------------------------------------------------------------------------------------------------------------------------------------------------------------------------------------------------------------------------------------------------------------------------------------------------------------------------------|--------------------------------------------------------------------------------------------------------------------------------------------------------------------------------------|--------------------|
| 5  | 17*  | 1. Prospectivo, aleatorizado, doble ciego<br>2. 55 pacientes, edad >21 años<br>3. Selección de pacientes remitidos a cirujanos de la columna vertebral a causa de lumbalgia y confirmación radiológica de compresión de la raíz nerviosa (hernia discal o estenosis central o foramina) en dos o más niveles, que (normalmente) no responden al tratamiento no quirúrgico de al menos seis semanas de duración; se incluyen los pacientes operados previamente; exclusiones extensas, entre ellas, reclamación de indemnización del trabajador pendiente<br>4. Hasta cuatro inyecciones: 1 ml compuesto de 6 mg betametasona + 1 ml de bupivacaína al 0,25 %, frente a 1 ml de bupivacaína al 0,25 % administrada con guía fluoroscópica con inyección de contraste para la verificación de la localización                                         | 1. Fracaso del tratamiento = el paciente escogió someterse a cirugía<br>2. Cuestionario de la North American Spine Society al inicio y en pacientes que no habían experimentado cirugía, al menos un año después de la inyección<br>3. Evaluación final entre los 13 y 28 meses (media, 23 meses) después de la primera inyección                                                                                                                                                                                                                                                                                              | 1. 26/55 pacientes eligieron someterse a cirugía<br>2. 8/28 pacientes tratados con bupivacaína + betametasona se sometieron a cirugía, frente a 18/27 pacientes tratados solamente con bupivacaína<br>3. 36 pacientes recibieron una inyección, 10 pacientes recibieron dos inyecciones, seis pacientes recibieron tres inyecciones; sólo 6/19 pacientes con inyecciones múltiples se sometieron a cirugía (composición de la inyección no de clarada)<br>4. Una tendencia hacia la disminución de los síntomas neurológicos desde el inicio hasta la evaluación final en pacientes que evitaban la cirugía; el análisis de subgrupos se informó sin el número de pacientes o las magnitudes de los efectos | 1. N/A<br>2. $p < 0,004$                                                                                                                                                             | III                |
| 6  | 16*  | 1. Prospectivo, aleatorizado, triple ciego<br>2. 80 pacientes; edad $44 \pm 13$ años en cada grupo (de 277 candidatos, de los cuales se consideraron idóneos 171)<br>3. Dolor unilateral que irradia con distribución radicular desde la espalda hasta debajo de la rodilla; 3-28 semanas; dolor en la pierna > dolor de espalda; no se necesitan signos; se realizaron RM y EMG (no se informa con qué criterios); exclusiones amplias, entre ellas, a causa de cirugía previa, solicitud de jubilación anticipada, depresión<br>4. Metilprednisolona + bupivacaína frente a solución salina normal, bajo fluoroscopia, después de una inyección de contraste para confirmar la localización; instrucciones sobre hábitos saludables para la espalda a las dos semanas de seguimiento, medicación contra el dolor y fisioterapia en caso necesario | 1. Criterio principal de valoración = dolor en la pierna medido en la EAV de 100 mm; diferencia media de 15 mm entre los grupos, considerada clínicamente significativa; diferencia media ajustada (DMA) respecto a las diferencias en las variables iniciales; evaluación inicial; inmediatamente después de la inyección, dos semanas después, y 1, 3, 6 y 12 meses después de la inyección<br>2. Criterio secundario: dolor de espalda en la EAV de 100 mm; discapacidad según el cuestionario de Oswestry; calidad de vida según el Nottingham Health Profiles; prueba de Lasègue; flexión lumbar<br>3. Análisis económico | 1. Dolor en la pierna izquierda: efecto inmediato (DMA, 11,9 mm) y a las dos semanas (DMA, 12,5 mm) a favor de los corticoides; sin diferencia a las cuatro semanas y a los tres meses; a los seis meses, peor el grupo de corticoides (DMA, 16,2 mm); sin diferencia a los 12 meses<br>2. Dolor de espalda: grupo tratado con corticoides peor a los tres meses (DMA, 12,2 mm) y a los seis meses (DMA, 13,5 mm); sin diferencias en otros momentos<br>3. Costes iguales en ambos grupos; 18 pacientes operados en el grupo con corticoides respecto a 15 en el grupo con solución salina                                                                                                                  | 1. $p = 0,02$ (efecto inmediato, 2 semanas); $p = 0,003$ (6 meses); en los otros casos, NS<br>2. $p = 0,02$ a los 3 meses; $p = 0,03$ a los 6 meses; en los otros casos, NS<br>3. NS | I                  |

\* Identificados en el artículo de revisión del ICSI<sup>10</sup>. Véase la discusión en el texto.

NS = no significativo; EAV = escala analógica visual; T = grupo de tratamiento; P = grupo placebo; N/A = no aplicable; DMA = diferencia entre los grupos de tratamiento en el cambio medio desde el inicio, ajustada respecto a las diferencias en las variables iniciales; RM = resonancia magnética; EMG = electromiograma.

búsqueda bibliográfica se debió al empleo de distintos términos de búsqueda. La revisión del ICSI no recopiló los artículos que no habían recurrido a la fluoroscopia, y el artículo de alta calidad sobre los resultados de las inyecciones perirradiculares transforaminales mediante fluoroscopia no incorporaba los términos que los autores del presente artículo utilizaron en la búsqueda inicial. Sin embargo, los resultados con ambas estrategias de búsqueda fueron similares, lo que refuerza la validez de las conclusiones y recomendaciones del presente trabajo.

**Principales hallazgos desde el punto de vista clínico.** Por lo que respecta a la cuestión principal de esta revisión,

la mejoría del dolor, los resultados de los cuatro estudios de alta calidad<sup>12-14,18</sup> son esencialmente coherentes y demuestran la siguiente pauta de eficacia en comparación con un grupo control: ineficaz a las 24 horas<sup>12</sup>; cierta eficacia de dos a seis semanas<sup>13,14,18</sup>; sin diferencias<sup>14</sup> o dolor de rebote a los tres meses<sup>18</sup> y a los seis meses<sup>18</sup>; sin diferencias después de un año<sup>13,18</sup>. La mejoría inmediata en la extremidad inferior después de la inyección, pero no en el dolor de espalda, puede haberse debido al anestésico local con el que se mezcló el corticoide en un estudio<sup>18</sup>.

Estos resultados refuerzan la percepción individual del beneficio de los corticoides epidurales, expresado en términos de alivio sintomático a corto

plazo, un resultado positivo en sí mismo. No obstante, la diferencia media del efecto (ventaja de los corticoides sobre el tratamiento control) fue pequeña, y normalmente no alcanzó el valor propuesto de una diferencia media clínicamente significativa<sup>18</sup> (15 mm en la escala analógica visual de dolor de 100 mm). Otros investigadores han demostrado que, a nivel individual, un valor óptimo de cambio clínicamente significativo en una escala de intensidad del dolor de 0 a 10 corresponde a un cambio absoluto de dos puntos (o a un cambio relativo del 33 %)<sup>21-25</sup>. Sin embargo, los estudios existentes no expresaron la magnitud del alivio en términos del porcentaje de pacientes que consiguieron una respuesta clínicamente significativa y, por lo tanto, no permiten el cálculo del número de pacientes necesario para tratar para que se produzca la mejoría en un paciente.

Estos resultados concuerdan con los de un estudio que comparó 43 pacientes tratados con una inyección epidural de metilprednisolona aplicada durante una discectomía lumbar unilateral con respecto a controles históricos comparables. Se demostró una menor necesidad de analgésicos narcóticos y no narcóticos y de relajantes musculares durante el período postoperatorio, así como una estancia hospitalaria más corta en los pacientes tratados (un promedio de 2,72 días en los pacientes tratados frente a 4,35 días en los pacientes no tratados)<sup>26</sup>. Las complicaciones de las inyecciones epidurales de corticoides descritas son normalmente leves y transitorias, siendo la más frecuente una cefalea transitoria. Las complicaciones graves son infrecuentes (meningitis séptica, aracnoiditis, meningitis bacteriana, absceso epidural y síndrome del cono medular) y suelen producirse a causa de una inyección subaracnoidea y no epidural. Pueden existir complicaciones que no se hayan descrito suficientemente y los datos sobre la seguridad registrados por médicos experimentados con un gran volumen de trabajo no necesariamente reflejan los datos registrados por médicos menos experimentados o que aplican menos el tratamiento. Estos resultados no responden a la mayoría de las otras cuestiones enumeradas en la tabla 1. En relación con la pregunta específica sobre si los corticoides permiten evitar la cirugía, los datos como tales son contradictorios y los estudios con el mejor diseño no revelan una mejoría con los corticoides epidurales. Los datos de estudios no tan bien diseñados son difíciles de interpretar y generalizar, al igual que aquéllos en contextos clínicos no controlados. Los datos no permiten deducir si se evita la cirugía debido al efecto terapéutico de los corticoides inyectados o a un efecto placebo, o porque el tratamiento acorta la evolución natural hacia la mejoría<sup>10</sup>. Los estudios tampoco abordan la com-

paración de las inyecciones epidurales de corticoides respecto a otras modalidades terapéuticas y el papel de las características del paciente y del profesional sanitario, por ejemplo, el temperamento y la tolerancia al dolor en la elección entre distintas opciones terapéuticas. Las recomendaciones dieron mayor importancia a los datos de los estudios mejor diseñados, que demostraron que las inyecciones epidurales de corticoides no daban lugar a un menor número de intervenciones quirúrgicas.

No obstante, un estudio no controlado<sup>27</sup>, con un seguimiento parcial de los pacientes tratados, ha identificado los factores que predicen un mal resultado: 1) un mayor número de tratamientos anteriores para el dolor; 2) el consumo de más fármacos; 3) dolor que no aumenta necesariamente con la actividad, y 4) aumento del dolor al toser. Los factores que predicen una ausencia de mejoría un año después del tratamiento son: 1) dolor que no interfiere con las actividades; 2) desempleo debido al dolor; 3) signo de Lasègue normal antes del tratamiento, y 4) dolor que no disminuye con los fármacos. Se necesitan estudios mejor diseñados para confirmar estas observaciones y expresarlas en términos modernos de número de enfermos que es necesario tratar, en relación con la presencia o ausencia de factores pronóstico de un mal resultado.

**Limitaciones.** Esta revisión presenta limitaciones debido a la imposibilidad de comparar todas las técnicas y todas las estrategias terapéuticas. Sin embargo, los resultados en términos de alivio del dolor y algunos de los criterios secundarios de valoración son similares tanto en los estudios iniciales como en los que utilizaron inyecciones transforaminales y fluoroscopia. Esta revisión no valoró la frecuencia de inyecciones o dosificación, y no evaluó la experiencia del cirujano, que según se dedujo era elevada en todos los informes publicados. La generalización de los resultados hallados se encuentra limitada. El objetivo central del alivio del dolor, indicación principal por la que se aplican las inyecciones epidurales de corticoides, representa una limitación respecto a la utilización de la mejoría de la función como criterio principal de valoración. No obstante, enmarca las impresiones subjetivas de los pacientes y de los profesionales sanitarios en una terminología basada en evidencias científicas que puede orientar la futura evaluación de esta modalidad terapéutica.

**RECOMENDACIONES Y CONCLUSIONES.** 1) Las inyecciones epidurales de corticoides pueden producir cierta mejoría del dolor radicular lumbosacro, si éste se mide entre dos y seis semanas después de la in-

yeción, en comparación con el tratamiento control (nivel de evidencia C, clase I-III). La magnitud promedio del efecto es pequeña y la generalización de la observación queda limitada por el pequeño número de estudios, limitados a poblaciones de pacientes muy escogidos, las escasas técnicas y dosis probadas, y la diversidad de tratamientos de comparación empleados. 2) En general, la inyección epidural de corticoides como tratamiento del dolor radicular lumbosacro no ha demostrado influir sobre el pronóstico funcional o sobre la necesidad de cirugía, ni aporta un alivio del dolor a largo plazo, más allá de los tres meses. No se recomienda su aplicación sistemática para estas indicaciones (nivel de evidencia B, clase I-III). 3) Los datos sobre el uso de inyecciones epidurales de corticoides para tratar el dolor radicular cervical son insuficientes para poder deducir una recomendación (nivel U).

#### RECOMENDACIONES SOBRE INVESTIGACIONES FUTURAS

1. Los nuevos estudios sobre la eficacia de los corticoides administrados por vía epidural para el dolor radicular lumbosacro deberían presentar un diseño adecuado y reunir los siguientes criterios: *a)* definición clara de los casos; *b)* criterios de valoración claros, con la aplicación de herramientas estandarizadas, que consideren la función como el criterio principal de valoración, y la mejoría del dolor clínicamente significativa<sup>23,25</sup> como un criterio secundario; *c)* uso de un grupo control (placebo o activo); *d)* diseño del estudio prospectivo; *e)* asignación aleatorizada; *f)* diseño del estudio con doble ciego, de modo que ni el paciente ni el evaluador conozcan el grupo de tratamiento al que pertenece el paciente, o bien con triple ciego, si el médico que administra los corticoides por vía epidural también desconoce el tratamiento que proporciona; *g)* suficiente poder estadístico, y *h)* análisis estadístico adecuado.
2. Los estudios sobre la administración epidural de corticoides para tratar el dolor radicular cervical, la lumbalgia no radicular o el dolor cervical también deberían diseñarse con rigor y reunir criterios similares.
3. Las principales preguntas pendientes son las siguientes:
  - a)* ¿Cuál es el grado de eficacia, expresado en términos de magnitud del efecto, duración del efecto y porcentaje de pacientes que obtienen una mejoría clínicamente significativa, en comparación con otros tratamientos?
  - b)* Utilización de un diseño controlado: ¿existen variables independientes que determinen la

ausencia de eficacia o una eficacia insuficiente? Considérese la posibilidad de estudiar en primer lugar a pacientes sin las supuestas variables independientes que determinan una eficacia insuficiente del tratamiento.

- c)* ¿Cuántos tratamientos son apropiados y a qué intervalos?
  - d)* ¿Con qué frecuencia se producen las complicaciones y cuáles son?
4. Inicialmente será necesario estandarizar algunas de las variables reflejadas en las preguntas de la tabla 1, como la técnica específica, la competencia mínima del médico responsable y la aplicación de tratamientos complementarios.
  5. Posteriormente puede planearse la investigación para evaluar el papel de estas variables. En concreto, será necesario evaluar las distintas técnicas mediante una metodología estandarizada.

#### DECLARACIÓN SOBRE LOS OBJETIVOS DEL TTA.

El Therapeutics and Technology Assessment (TTA) Subcommittee elabora informes basados en evidencias científicas que evalúan la seguridad, la utilidad y la efectividad de los fármacos o tecnologías terapéuticas nuevos, emergentes o probados en el campo de la neurología. Estos informes se desarrollan mediante un proceso riguroso de definición del tema, evaluación y valoración de la calidad de los datos y conversión de las conclusiones de los estudios en recomendaciones prácticas que puedan ayudar a orientar el ejercicio de la neurología.

**EXENCIÓN DE RESPONSABILIDAD.** Este informe se presenta como un servicio educativo de la American Academy of Neurology. Se basa en un análisis de la evidencia científica y clínica actual. No pretende incluir todos los métodos apropiados posibles en la atención de una afección neurológica particular ni todos los criterios legítimos para la elección de un procedimiento específico. Tampoco se propone excluir ninguna metodología alternativa razonable. La AAN reconoce que las decisiones concretas en la atención del paciente son una prerrogativa del paciente y del médico que lo asiste, teniendo en cuenta todas las circunstancias implicadas.

#### DECLARACIÓN SOBRE CONFLICTOS DE INTERESES.

La American Academy of Neurology se dedica a producir guías de práctica clínica (GPC) independientes, críticas y fiables. Se realizan esfuerzos importantes para reducir al mínimo los posibles conflictos de intereses que puedan influir en las recomendaciones de esta GPC. En lo posible, la AAN evita la participación de personas con intereses económicos

sobre el éxito o fracaso de los productos evaluados en las GPC y de los autores de las guías. Todos los autores cumplimentaron cuestionarios sobre conflictos de intereses que fueron examinados por un comité de supervisión antes del inicio del proyecto. La AAN restringe la participación de los autores con conflictos de intereses importantes. La AAN prohíbe la participación comercial directa en los proyectos de las guías o en la financiación de éstas. Los borradores de la guía han sido examinados por al menos tres comités de la ANN, una red de neurólogos, revisores científicos externos de *Neurology* y representantes de áreas de conocimiento relacionadas. La política sobre conflictos de intereses de los autores de las guías de la AAN (AAN Guideline Author Conflict of Interest Policy) puede consultarse en [www.aan.com](http://www.aan.com). Por lo que respecta a este informe concreto, todos los autores han declarado que no tienen conflictos de intereses. Uno de los autores practica inyecciones epidurales de corticoides.

### APÉNDICE 1

Miembros del subcomité de evaluación terapéutica y tecnológica: Yuen T. So, MD, PhD (Copresidente); Janis Miyasaki, MD, FAAN (Copresidente); Douglas S. Goodin, MD (de oficio); Carmel Armon, MD, MHS, FAAN (de oficio); Richard M. Dubinsky, MD, MPH, FAAN; Mark Hallett, MD, FAAN; Cynthia L. Harden, MD; Michael A. Sloan, MD, MS, FAAN; James C. Stevens, MD, FAAN; Fenwick T. Nichols, III, MD; Kenneth J. Mack, MD, PhD; Paul W. O'Connor, MD; Vinay Chaudhry, MD, FAAN.

### APÉNDICE 2

Clasificación de la AAN sobre el grado de evidencia de la intervención terapéutica

**Clase I.** Ensayo clínico controlado aleatorizado y prospectivo, con evaluación ciega del resultado, en una población representativa. Se exigen las siguientes condiciones: a) criterio(s) principal(es) de valoración claramente definido(s); b) criterios de exclusión o inclusión claramente definidos; c) descripción satisfactoria de los abandonos y cruces, con un número suficientemente bajo para producir el mínimo sesgo posible; y d) presentación de características basales de interés esencialmente equivalentes entre los grupos de tratamiento o una corrección estadística apropiada de las diferencias.

**Clase II.** Estudio de cohorte prospectivo de grupos comparables a partir de una población representativa con una evaluación ciega del resultado y que cumple los puntos a-d indicados anteriormente, O BIEN, un ensayo controlado aleatorizado (ECA) en una población representativa, que carece de uno de los criterios a-d.

**Clase III.** Otros ensayos controlados (que incluyan individuos control bien caracterizados con una evolución natural de la enfermedad, o pacientes mismos que sirvan como control) en una población representativa, donde el resultado se evalúa de forma independiente o se deriva de forma independiente mediante un criterio de valoración objetivo\*.

**Clase IV.** Pruebas de estudios no controlados, series de casos, observaciones clínicas u opinión experta.

\* Criterio de valoración objetivo: un criterio de valoración que con poca probabilidad esté influido por la expectación o el sesgo de un observador (paciente, médico responsable, investigador) (p. ej., análisis sanguíneos, datos administrativos).

### APÉNDICE 3

Clasificación de las recomendaciones

**A=** Demostrado como efectivo, inefectivo o dañino para la enfermedad en cuestión en la población especificada. (La clasificación en el nivel A exige al menos dos estudios concordantes de la clase I.)

**B=** Probablemente efectivo, inefectivo o dañino para la enfermedad en cuestión en la población especificada. (La clasificación en el nivel B exige al menos un estudio de clase I o al menos dos estudios concordantes de clase II.)

**C=** Posiblemente efectivo, inefectivo o dañino para la enfermedad en cuestión en la población especificada. (La clasificación en el nivel C exige al menos un estudio de clase II o al menos dos estudios concordantes de clase III.)

**U=** Datos insuficientes o contradictorios; según el conocimiento actual, el tratamiento no está demostrado.

### REFERENCIAS BIBLIOGRÁFICAS

1. Kepes ER, Duncalf D. Treatment of backache with spinal injections of local anesthetics, spinal and systemic steroids. A review. *Pain* 1985;22:33-47.
2. Luo X, Pietrobon R, Sun SX, Liu GG, Hey L. Estimates and patterns of direct health care expenditures among individuals with back pain in the United States. *Spine* 2004;29:79-86.
3. Straus BN. Chronic pain of spinal origin: the costs of intervention. *Spine* 2002;27:2614-2619.
4. Carrino JA, Morrison WB, Parker L, Schweitzer ME, Levin DC, Sunshine JH. Spinal injection procedures: volume, provider distribution, and reimbursement in the U.S. Medicare population from 1993 to 1999. *Radiology* 2002;225:723-729.
5. Lieve J-A, Bloch-Michel H, Pean G, Uro J. L'hydrocortisone en injection locale. *Rev Rheum Mal Osteoartic* 1953;20:310-311.
6. Lieve JA, Bloch-Michael H, Attali P. [Trans-sacral injection; clinical and radiological study] [French]. *Bull Mem Soc Med Hop Paris* 1957;73:1110-1118.
7. Koes BW, Scholten RJ, Mens JMA, Bouter LM. Efficacy of epidural steroid injections for low-back pain and sciatica: a systematic review of randomized clinical trials. *Pain* 1995;63:279-288.
8. Watts RW, Silagy CA. A meta-analysis on the efficacy of epidural corticosteroids in the treatment of sciatica. *Anesth Intensive Care* 1995;23:564-569.
9. Nelemans PJ, deBie RA, deVet HC, Sturmans F. Injection therapy for subacute and chronic benign low back pain. *Spine* 2001;26:501-515.
10. Schultz D, Hurdle M, Schellas K, Elliot T, Lynch P. Fluoroscopically guided transforaminal epidural steroid injections for lumbar radicular pain. Technology Assessment Report, Institute for Clinical Systems Improvement; 2004.
11. Fillingim RB, Price DD. What is controlled for in placebo-controlled trials? *Mayo Clinic Proc* 2005;80:1119-1121.
12. Cuckler JM, Bernini PA, Wiesel SW, Booth RE Jr, Rothman RH, Pickens GT. The use of epidural steroids in the treat-

- ment of lumbar radicular pain. *J Bone Joint Surg Am* 1985; 67:63–66.
13. Bush K, Hillier S. A controlled study of caudal epidural injections of triamcinolone plus procaine for the management of intractable sciatica. *Spine* 1991;16:572–575.
14. Carrete S, Leclaire R, Marcoux S, et al. Epidural corticosteroid injections for sciatica due to herniated nucleus pulposus. *N Engl J Med* 1997;336:1634–1640.
15. Buchner M, Zeifang F, Brocai DR, Schiltenswolf M. Epidural corticosteroid injection in the conservative management of sciatica. *Clin Orthop* 2000;375:149–156.
16. Kraemer J, Ludwig J, Bickert U, Owczarek V, Traupe M. Lumbar epidural perineural injection: a new technique. *Eur Spine J* 1997;6:357–361.
17. Riew KD, Yin YY, Gilula L, et al. The effect of nerve-root injections on the need for operative treatment of lumbar radicular pain. *J Bone Joint Surg* 2000;82:1589–1593.
18. Karppinen J, Mlamivaara A, Kurunlahti M, et al. Periradicular infiltration for sciatica. A randomized controlled trial. *Spine* 2001;26:1059–1067.
19. Abraham SE, O'Connor TC. Complications associated with epidural steroid injections. *Reg Anesth* 1996;21:149–162.
20. Botwin KP, Gruber RD, Bouchlas CG, et al. Complications of fluoroscopically guided caudal epidural injections. *Am J Phys Med Rehabil* 2001;80:416–424.
21. Horlocker TT, Bajwa ZH, Ashraf Z, et al. Risk assessment of hemorrhagic complications associated with nonsteroidal antiinflammatory medications in ambulatory pain clinic patients undergoing epidural steroid injection. *Anesth Analg* 2002;95:1691–1697.
22. Botwin KP, Thomas S, Gruber RD, et al. Radiation exposure of the spinal interventionalist performing fluoroscopically guided lumbar transforaminal epidural steroid injections. *Arch Phys Med Rehabil* 2002;83:697–701.
23. Farrar JT. What is clinically meaningful: outcome measures in pain clinical trials. *Clin J Pain* 2000;16:S106–S112.
24. Farrar JT, Portenoy RK, Berlin JA, Kinman JL, Strom BL. Defining the clinically important difference in pain outcome measures. *Pain* 2000;88:287–294.
25. Farrar JT, Berlin JA, Strom BL. Clinically important changes in acute pain outcome measures: a validation study. *J Pain Symptom Manage* 2003;25:406–411.
26. Davis R, Emmons SE. Benefits of epidural methylprednisolone in a unilateral lumbar discectomy: a matched controlled study. *J Spinal Disord* 1990;3:299–306; discussion 307.
27. Jamison RN, VadeBoncouer T, Ferrante FM. Low back pain patients unresponsive to an epidural steroid injection: identifying predictive factors. *Clin J Pain* 1991;7:311–317.
